# Supplementary material for: Probing for Sparse and Fast Variable Selection with Model-Based Boosting
Source: Comput Math Methods Med. 2017 Jul 31;2017:1421409. doi: 10.1155/2017/1421409 (PMC5555005; doi:10.1155/2017/1421409)
Supplement: Supplementary file 1 — The supplementary material contains the code used to run the experiments as well as the resulting data used to create the figures and tables. [file 1421409.f1.zip]

Archive with 13,223 entries (9,995 files):
- websupplement/
- websupplement/README.R
- websupplement/.Rhistory
- websupplement/code/
- websupplement/code/simulation.R
- websupplement/code/reduce.R
- websupplement/code/defs.R
- websupplement/code/application.R
- websupplement/data/
- websupplement/data/simulation.RData
- websupplement/data/.Rhistory
- websupplement/data/registry/
- websupplement/data/registry/registry.rds
- websupplement/data/registry/results/
- websupplement/data/registry/results/1179.rds
- websupplement/data/registry/results/11784.rds
- websupplement/data/registry/results/11775.rds
- websupplement/data/registry/results/11746.rds
- websupplement/data/registry/results/11740.rds
- websupplement/data/registry/results/11739.rds
- websupplement/data/registry/results/11723.rds
- websupplement/data/registry/results/11718.rds
- websupplement/data/registry/results/11703.rds
- websupplement/data/registry/results/11697.rds
- websupplement/data/registry/results/11666.rds
- websupplement/data/registry/results/11651.rds
- websupplement/data/registry/results/11636.rds
- websupplement/data/registry/results/11633.rds
- websupplement/data/registry/results/11614.rds
- websupplement/data/registry/results/1161.rds
- websupplement/data/registry/results/11592.rds
- websupplement/data/registry/results/11582.rds
- websupplement/data/registry/results/1158.rds
- websupplement/data/registry/results/11568.rds
- websupplement/data/registry/results/11544.rds
- websupplement/data/registry/results/11486.rds
- websupplement/data/registry/results/11484.rds
- websupplement/data/registry/results/11459.rds
- websupplement/data/registry/results/11443.rds
- websupplement/data/registry/results/11408.rds
- websupplement/data/registry/results/11404.rds
- websupplement/data/registry/results/11403.rds
- websupplement/data/registry/results/11390.rds
- websupplement/data/registry/results/11388.rds
- websupplement/data/registry/results/11351.rds
- websupplement/data/registry/results/11315.rds
- websupplement/data/registry/results/11291.rds
- websupplement/data/registry/results/11274.rds
- websupplement/data/registry/results/11272.rds
- websupplement/data/registry/results/11268.rds
- websupplement/data/registry/results/11266.rds
- websupplement/data/registry/results/1124.rds
- websupplement/data/registry/results/1123.rds
- websupplement/data/registry/results/1122.rds
- websupplement/data/registry/results/11213.rds
- websupplement/data/registry/results/11210.rds
- websupplement/data/registry/results/1121.rds
- websupplement/data/registry/results/11194.rds
- websupplement/data/registry/results/11178.rds
- websupplement/data/registry/results/11172.rds
- websupplement/data/registry/results/11164.rds
- websupplement/data/registry/results/1115.rds
- websupplement/data/registry/results/11142.rds
- websupplement/data/registry/results/11119.rds
- websupplement/data/registry/results/11103.rds
- websupplement/data/registry/results/11073.rds
- websupplement/data/registry/results/11072.rds
- websupplement/data/registry/results/11065.rds
- websupplement/data/registry/results/11061.rds
- websupplement/data/registry/results/11056.rds
- websupplement/data/registry/results/1103.rds
- websupplement/data/registry/results/11017.rds
- websupplement/data/registry/results/11007.rds
- websupplement/data/registry/results/10995.rds
- websupplement/data/registry/results/10994.rds
- websupplement/data/registry/results/10941.rds
- websupplement/data/registry/results/10905.rds
- websupplement/data/registry/results/10890.rds
- websupplement/data/registry/results/10888.rds
- websupplement/data/registry/results/10877.rds
- websupplement/data/registry/results/10860.rds
- websupplement/data/registry/results/10859.rds
- websupplement/data/registry/results/10836.rds
- websupplement/data/registry/results/10807.rds
- websupplement/data/registry/results/10790.rds
- websupplement/data/registry/results/10785.rds
- websupplement/data/registry/results/10752.rds
- websupplement/data/registry/results/10751.rds
- websupplement/data/registry/results/10750.rds
- websupplement/data/registry/results/10745.rds
- websupplement/data/registry/results/10733.rds
- websupplement/data/registry/results/10698.rds
- websupplement/data/registry/results/10687.rds
- websupplement/data/registry/results/10658.rds
- websupplement/data/registry/results/1063.rds
- websupplement/data/registry/results/10608.rds
- websupplement/data/registry/results/10592.rds
- websupplement/data/registry/results/10581.rds
- websupplement/data/registry/results/10572.rds
- websupplement/data/registry/results/10530.rds
- websupplement/data/registry/results/10492.rds
- websupplement/data/registry/results/1049.rds
- websupplement/data/registry/results/10472.rds
- websupplement/data/registry/results/10464.rds
- websupplement/data/registry/results/10462.rds
- websupplement/data/registry/results/10459.rds
- websupplement/data/registry/results/10450.rds
- websupplement/data/registry/results/10423.rds
- websupplement/data/registry/results/1042.rds
- websupplement/data/registry/results/10410.rds
- websupplement/data/registry/results/10400.rds
- websupplement/data/registry/results/10391.rds
- websupplement/data/registry/results/10358.rds
- websupplement/data/registry/results/10352.rds
- websupplement/data/registry/results/1032.rds
- websupplement/data/registry/results/10310.rds
- websupplement/data/registry/results/10281.rds
- websupplement/data/registry/results/10279.rds
- websupplement/data/registry/results/10232.rds
- websupplement/data/registry/results/10231.rds
- websupplement/data/registry/results/10229.rds
- websupplement/data/registry/results/10205.rds
- websupplement/data/registry/results/10186.rds
- websupplement/data/registry/results/10166.rds
- websupplement/data/registry/results/10128.rds
- websupplement/data/registry/results/10126.rds
- websupplement/data/registry/results/10123.rds
- websupplement/data/registry/results/10119.rds
- websupplement/data/registry/results/10110.rds
- websupplement/data/registry/results/10102.rds
- websupplement/data/registry/results/10091.rds
- websupplement/data/registry/results/10079.rds
- websupplement/data/registry/results/10077.rds
- websupplement/data/registry/results/10062.rds
- websupplement/data/registry/results/1006.rds
- websupplement/data/registry/results/10059.rds
- websupplement/data/registry/results/10054.rds
- websupplement/data/registry/results/10047.rds
- websupplement/data/registry/results/10037.rds
- websupplement/data/registry/results/1003.rds
- websupplement/data/registry/results/10023.rds
- websupplement/data/registry/results/10008.rds
- websupplement/data/registry/results/1329.rds
- websupplement/data/registry/results/1320.rds
- websupplement/data/registry/results/132.rds
- websupplement/data/registry/results/13186.rds
- websupplement/data/registry/results/13182.rds
- websupplement/data/registry/results/13175.rds
- websupplement/data/registry/results/13173.rds
- websupplement/data/registry/results/1316.rds
- websupplement/data/registry/results/13159.rds
- websupplement/data/registry/results/13134.rds
- websupplement/data/registry/results/13125.rds
- websupplement/data/registry/results/13110.rds
- websupplement/data/registry/results/13109.rds
- websupplement/data/registry/results/13107.rds
- websupplement/data/registry/results/13080.rds
- websupplement/data/registry/results/1307.rds
- websupplement/data/registry/results/12974.rds
- websupplement/data/registry/results/12971.rds
- websupplement/data/registry/results/12942.rds
- websupplement/data/registry/results/12941.rds
- websupplement/data/registry/results/12940.rds
- websupplement/data/registry/results/12935.rds
- websupplement/data/registry/results/1293.rds
- websupplement/data/registry/results/12912.rds
- websupplement/data/registry/results/12903.rds
- websupplement/data/registry/results/1290.rds
- websupplement/data/registry/results/12881.rds
- websupplement/data/registry/results/12853.rds
- websupplement/data/registry/results/12846.rds
- websupplement/data/registry/results/12842.rds
- websupplement/data/registry/results/12834.rds
- websupplement/data/registry/results/12750.rds
- websupplement/data/registry/results/12742.rds
- websupplement/data/registry/results/12735.rds
- websupplement/data/registry/results/12729.rds
- websupplement/data/registry/results/12705.rds
- websupplement/data/registry/results/12699.rds
- websupplement/data/registry/results/12674.rds
- websupplement/data/registry/results/12657.rds
- websupplement/data/registry/results/12655.rds
- websupplement/data/registry/results/12646.rds
- websupplement/data/registry/results/12635.rds
- websupplement/data/registry/results/12628.rds
- websupplement/data/registry/results/12627.rds
- websupplement/data/registry/results/12591.rds
- websupplement/data/registry/results/12590.rds
- websupplement/data/registry/results/12589.rds
- websupplement/data/registry/results/12571.rds
- websupplement/data/registry/results/12570.rds
- websupplement/data/registry/results/1256.rds
- websupplement/data/registry/results/12539.rds
- websupplement/data/registry/results/12518.rds
- websupplement/data/registry/results/12514.rds
- websupplement/data/registry/results/12510.rds
- websupplement/data/registry/results/12507.rds
- websupplement/data/registry/results/12489.rds
- websupplement/data/registry/results/12487.rds
- websupplement/data/registry/results/12480.rds
- websupplement/data/registry/results/12451.rds
- websupplement/data/registry/results/12449.rds
- websupplement/data/registry/results/12436.rds
- websupplement/data/registry/results/12433.rds
- websupplement/data/registry/results/1243.rds
- websupplement/data/registry/results/12426.rds
- websupplement/data/registry/results/1242.rds
- websupplement/data/registry/results/12419.rds
- websupplement/data/registry/results/1240.rds
- websupplement/data/registry/results/12397.rds
- websupplement/data/registry/results/12395.rds
- websupplement/data/registry/results/1239.rds
- websupplement/data/registry/results/12387.rds
- websupplement/data/registry/results/1236.rds
- websupplement/data/registry/results/12351.rds
- websupplement/data/registry/results/12350.rds
- websupplement/data/registry/results/12343.rds
- websupplement/data/registry/results/12340.rds
- websupplement/data/registry/results/12335.rds
- websupplement/data/registry/results/12330.rds
- websupplement/data/registry/results/12313.rds
- websupplement/data/registry/results/12307.rds
- websupplement/data/registry/results/12301.rds
- websupplement/data/registry/results/123.rds
- websupplement/data/registry/results/12284.rds
- websupplement/data/registry/results/12280.rds
- websupplement/data/registry/results/12262.rds
- websupplement/data/registry/results/12258.rds
- websupplement/data/registry/results/12231.rds
- websupplement/data/registry/results/12214.rds
- websupplement/data/registry/results/12194.rds
- websupplement/data/registry/results/12168.rds
- websupplement/data/registry/results/12157.rds
- websupplement/data/registry/results/12131.rds
- websupplement/data/registry/results/12107.rds
- websupplement/data/registry/results/12106.rds
- websupplement/data/registry/results/12103.rds
- websupplement/data/registry/results/12080.rds
- websupplement/data/registry/results/12075.rds
- websupplement/data/registry/results/12051.rds
- websupplement/data/registry/results/12030.rds
- websupplement/data/registry/results/12017.rds
- websupplement/data/registry/results/12010.rds
- websupplement/data/registry/results/12007.rds
- websupplement/data/registry/results/11996.rds
- websupplement/data/registry/results/11993.rds
- websupplement/data/registry/results/11989.rds
- websupplement/data/registry/results/11988.rds
- websupplement/data/registry/results/11981.rds
- websupplement/data/registry/results/11979.rds
- websupplement/data/registry/results/11957.rds
- websupplement/data/registry/results/11953.rds
- websupplement/data/registry/results/11952.rds
- websupplement/data/registry/results/11946.rds
- websupplement/data/registry/results/11943.rds
- websupplement/data/registry/results/11919.rds
- websupplement/data/registry/results/11914.rds
- websupplement/data/registry/results/11900.rds
- websupplement/data/registry/results/11898.rds
- websupplement/data/registry/results/11897.rds
- websupplement/data/registry/results/11882.rds
- websupplement/data/registry/results/11876.rds
- websupplement/data/registry/results/11868.rds
- websupplement/data/registry/results/11864.rds
- websupplement/data/registry/results/11850.rds
- websupplement/data/registry/results/11843.rds
- websupplement/data/registry/results/11841.rds
- websupplement/data/registry/results/11829.rds
- websupplement/data/registry/results/11817.rds
- websupplement/data/registry/results/11813.rds
- websupplement/data/registry/results/2893.rds
- websupplement/data/registry/results/2873.rds
- websupplement/data/registry/results/2863.rds
- websupplement/data/registry/results/286.rds
- websupplement/data/registry/results/2853.rds
- websupplement/data/registry/results/2792.rds
- websupplement/data/registry/results/2790.rds
- websupplement/data/registry/results/2789.rds
- websupplement/data/registry/results/2777.rds
- websupplement/data/registry/results/2774.rds
- websupplement/data/registry/results/277.rds
- websupplement/data/registry/results/2748.rds
- websupplement/data/registry/results/2744.rds
- websupplement/data/registry/results/2709.rds
- websupplement/data/registry/results/2700.rds
- websupplement/data/registry/results/2695.rds
- websupplement/data/registry/results/2669.rds
- websupplement/data/registry/results/2665.rds
- websupplement/data/registry/results/2659.rds
- websupplement/data/registry/results/2627.rds
- websupplement/data/registry/results/2619.rds
- websupplement/data/registry/results/2616.rds
- websupplement/data/registry/results/2606.rds
- websupplement/data/registry/results/2602.rds
- websupplement/data/registry/results/2588.rds
- websupplement/data/registry/results/256.rds
- websupplement/data/registry/results/2552.rds
- websupplement/data/registry/results/2513.rds
- websupplement/data/registry/results/2509.rds
- websupplement/data/registry/results/2503.rds
[truncated: 9,700 more entries]
