# Supplementary material for: Probing for Sparse and Fast Variable Selection with Model-Based Boosting
Source: Comput Math Methods Med. 2017 Jul 31;2017:1421409. doi: 10.1155/2017/1421409 (PMC5555005; doi:10.1155/2017/1421409)
Supplement: Supplementary file 1 — The supplementary material contains the code used to run the experiments as well as the resulting data used to create the figures and tables. [file 1421409.f1.zip › websupplement/code/defs.R]

library(batchtools)
library(mboost)
library(stabs)
library(mvtnorm)

OVERWRITE = FALSE

# settings cluster
WALLTIME = 2L * 60L
MEMORY = 1024L
NTASKS = 1L


#settings data generation

P = c(100, 500, 1000)
N = c(100, 500)
PINF = c(5, 20)
TOEPBASE = 0.9


# setting stabsel
PI = c(0.6, 0.75, 0.9)
PFER = c(1, 2.5, 8)


REPLICATIONS = 100L
